# Supplementary material
Source: PubMed Central journal article supplement (PMC5182512)
Supplement: NIHMS836360-supplement-Supplementary__Online_Data.pdf [file NIHMS836360-supplement-Supplementary__Online_Data.pdf]

## **SUPPLEMENTARY ONLINE DATA**

Characterization, Mutagenesis and Mechanistic Analysis of an Ancient Algal Sterol C24-Methyltransferase: Implications for Understanding Sterol Evolution in the Green Lineage

Brad A. Haubrich,<sup>\*</sup> Emily K. Collins,<sup>\*1</sup> Alicia L. Howard,<sup>\*</sup> Qian Wang,<sup>+1</sup> William J. Snell,<sup>+1</sup> Matthew B. Miller,<sup>\*</sup> Crista D. Thomas,<sup>\*</sup> Stephanie K. Pleasant<sup>\*1</sup> and W. David Nes<sup>\*2</sup>

<sup>\*</sup>Center for Chemical Biology and Department of Chemistry and Biochemistry, Texas Tech University, Lubbock, Texas 79409 and <sup>+</sup>Department of Cell Biology, University of Texas Southwestern Medical School, Dallas, Texas 75390

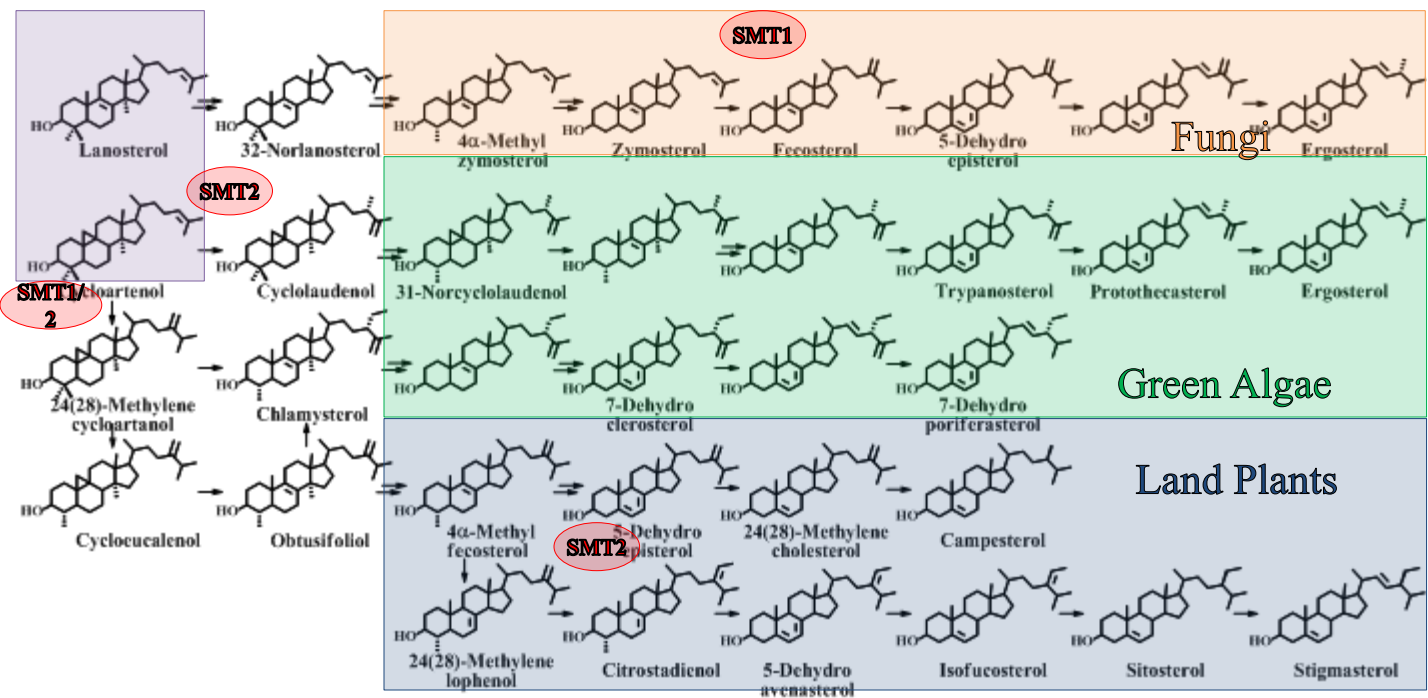

Supplemental Figure S1. Comparative sterol biosynthesis across kingdoms in Eukaryota as adapted from references 1-5. Biosynthetic steps catalyzed by SMTs are highlighted in red. .

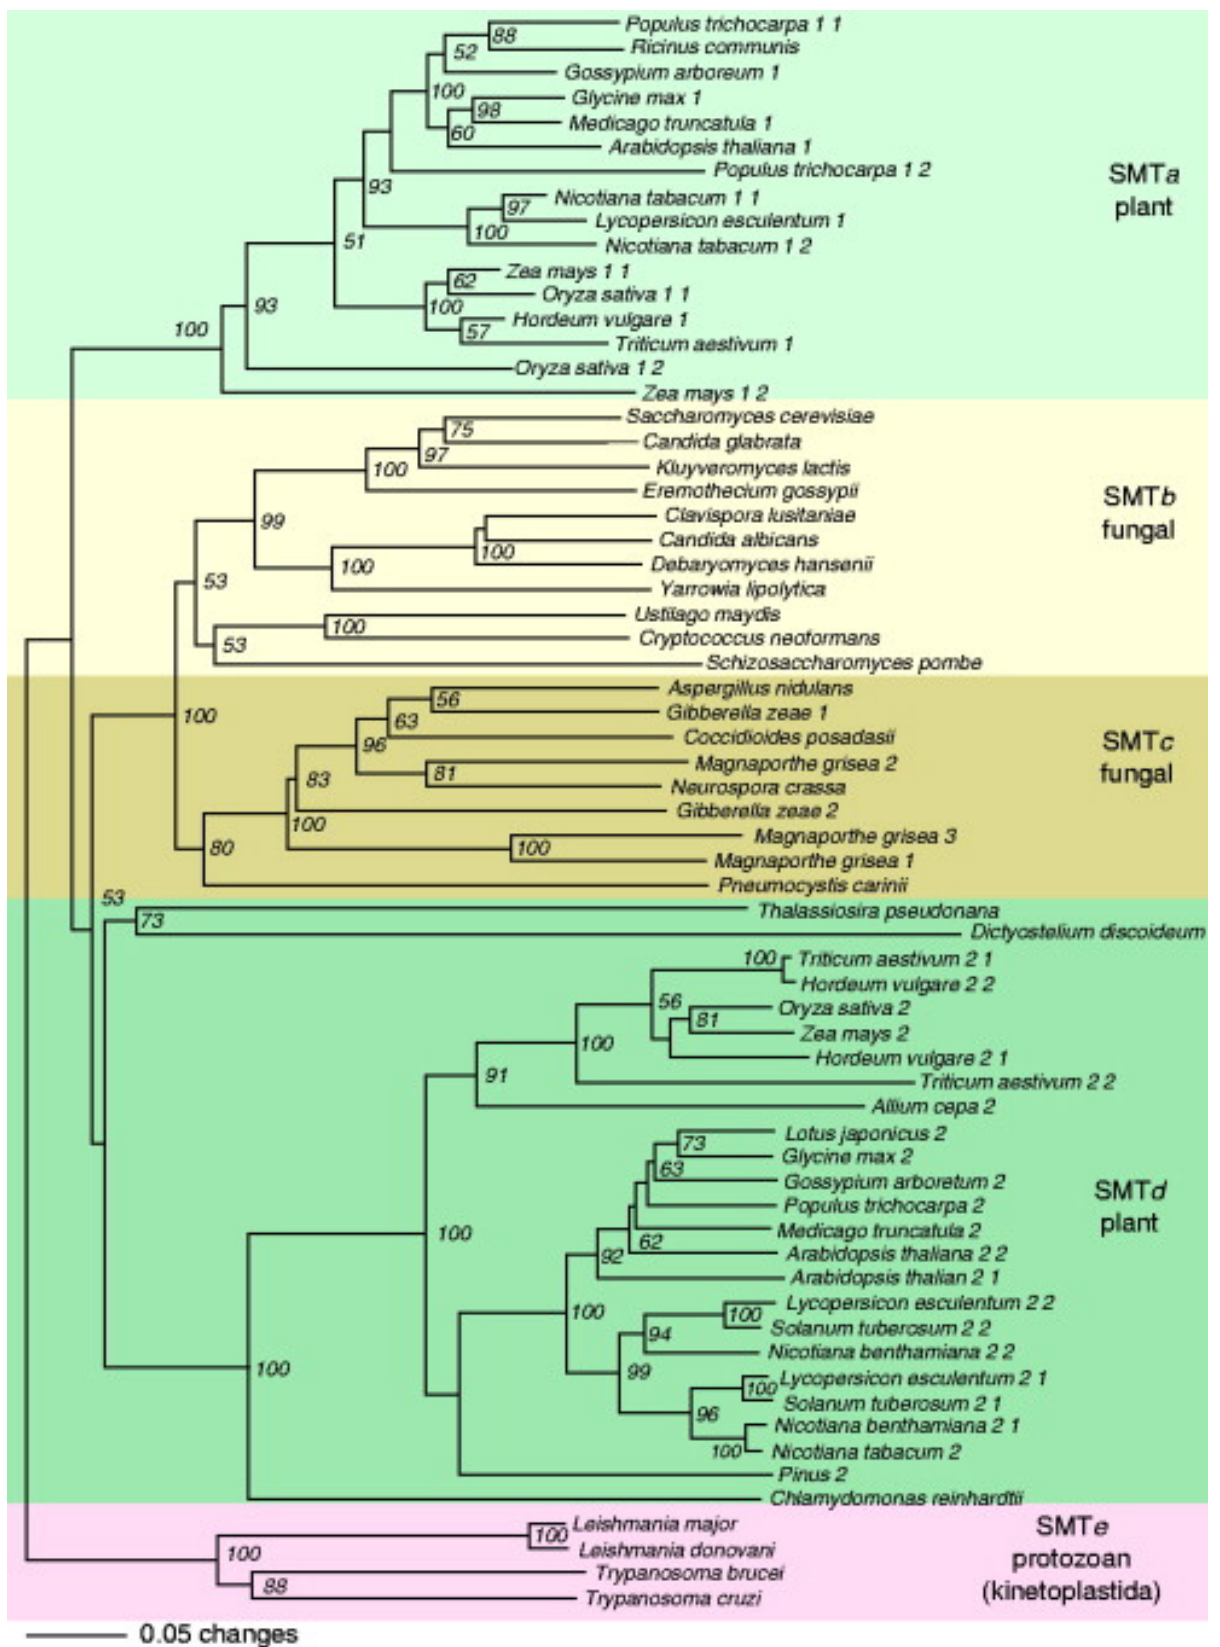

Supplemental Figure S2. Phylogenetic tree of 24- and 28-SMTs. Adapted from References 3 and 5.

Supplemental Table S1. Comparison of the occurrence of putative and known SMT genes across kingdoms.

| Strain <sup>1</sup>                  | Class               | Taxon            | Source <sup>2</sup> | Subfamily <sup>3</sup> | Type <sup>4</sup> | Percent Similarity <sup>5</sup> |
|--------------------------------------|---------------------|------------------|---------------------|------------------------|-------------------|---------------------------------|
| <i>Chlamydomonas reinhardtii</i>     | Chlorophyceae       | Green alga       | gi 158279461        | d                      | SMT2              | 100%                            |
| <i>Cucumis sativus</i>               | Magnoliopsida       | Flowering plant  | gi 449517755        | a                      | SMT1-2            | 39.60%                          |
| <i>Selaginella moellendorffii</i>    | Isoetopsida         | Lycophyte        | gi 302769362        | a                      | SMT1              | 38.70%                          |
| <i>Cucumis sativus</i>               | Magnoliopsida       | Flowering plant  | gi 449464010        | a                      | SMT1              | 38.20%                          |
| <i>Glycine max</i>                   | Magnoliopsida       | Flowering plant  | gi 351725990        | a                      | SMT1              | 37.10%                          |
| <i>Physcomitrella patens</i>         | Bryopsida           | Moss             | gi 162662665        | a                      | SMT1              | 35.80%                          |
| <i>Amphimedon queenslandica</i>      | Demospongia         | Demosponge       | gi 340378018        | a                      | SMT1              | 35.70%                          |
| <i>Cyanidioschyzon merolae</i>       | Cyanidiophyceae     | Red alga         | gi 449018476        | a                      | SMT1              | 30.10%                          |
| <i>Aphanomyces euteiches</i>         | Oomycota            | Water mold       | gi 189026959        | a                      | SMT1              | 27.60%                          |
| <i>Saccharomyces cerevisiae</i>      | Saccharomycetes     | Yeast            | gi 396515           | b                      | SMT1              | 37.10%                          |
| <i>Paracoccidioides brasiliensis</i> | Eurotiomycetes      | Dimorphic fungus | gi 226288403        | c                      | SMT1              | 34.50%                          |
| <i>Cucumis sativus</i>               | Magnoliopsida       | Flowering plant  | gi 449437406        | d                      | SMT2              | 48.90%                          |
| <i>Physcomitrella patens</i>         | Bryopsida           | Moss             | gi 162676403        | d                      | SMT2-2            | 48.80%                          |
| <i>Physcomitrella patens</i>         | Bryopsida           | Moss             | gi 162676411        | d                      | SMT2-1            | 48.10%                          |
| <i>Selaginella moellendorffii</i>    | Isoetopsida         | Lycophyte        | gi 300156481        | d                      | SMT2-1            | 48.10%                          |
| <i>Physcomitrella patens</i>         | Bryopsida           | Moss             | gi 168047907        | d                      | SMT2-3            | 47.70%                          |
| <i>Selaginella. moellendorffii</i>   | Isoetopsida         | Lycophyte        | gi 300153528        | d                      | SMT2-2            | 47.50%                          |
| <i>Glycine max</i>                   | Magnoliopsida       | Flowering plant  | gi 242755468        | d                      | SMT2-2            | 46.00%                          |
| <i>Glycine max</i>                   | Magnoliopsida       | Flowering plant  | gi 242755433        | d                      | SMT2-1            | 43.80%                          |
| <i>Thalassiosira pseudonana</i>      | Coscinodiscophyceae | Diatom           | gi 223996139        | d                      | SMT2              | 38.00%                          |
| <i>Thalassiosira pseudonana</i>      | Coscinodiscophyceae | Diatom           | gi 224006796        | d                      | SMT2              | 36.80%                          |
| <i>Dictyostelium discoideum</i>      | Dictyostelia        | Slime mold       | gi 60464861         | d                      | SMT2              | 35.90%                          |
| <i>Ectocarpus siliculosus</i>        | Phaeophyceae        | Brown algae      | gi 299469830        | d                      | SMT2              | 34.10%                          |
| <i>Ectocarpus siliculosus</i>        | Phaeophyceae        | Brown algae      | gi 299469813        | d                      | SMT2-1            | 32.20%                          |
| <i>Trypanosoma cruzi</i>             | Zoomastigophora     | Kinetoplastid    | gi 407843552        | e                      | SMT1              | 32.50%                          |
| <i>Trypanosoma brucei</i>            | Zoomastigophora     | Kinetoplastid    | gi 70832598         | e                      | SMT1              | 32.30%                          |

<sup>1</sup>Host organism of SMT

<sup>2</sup>Gene sequence from GenBank

<sup>3</sup>Based on the grouping of SMTs from the phylogenetic tree shown in Fig. S2.

<sup>4</sup>Based on the annotation from the GenBank or for *CrSMT* and *E. siliculosus* SMT2-1 based on biochemical reasoning,

<sup>5</sup>Percent similarity of amino acid sequences is relative to the amino acid sequence of *CrSMT*.

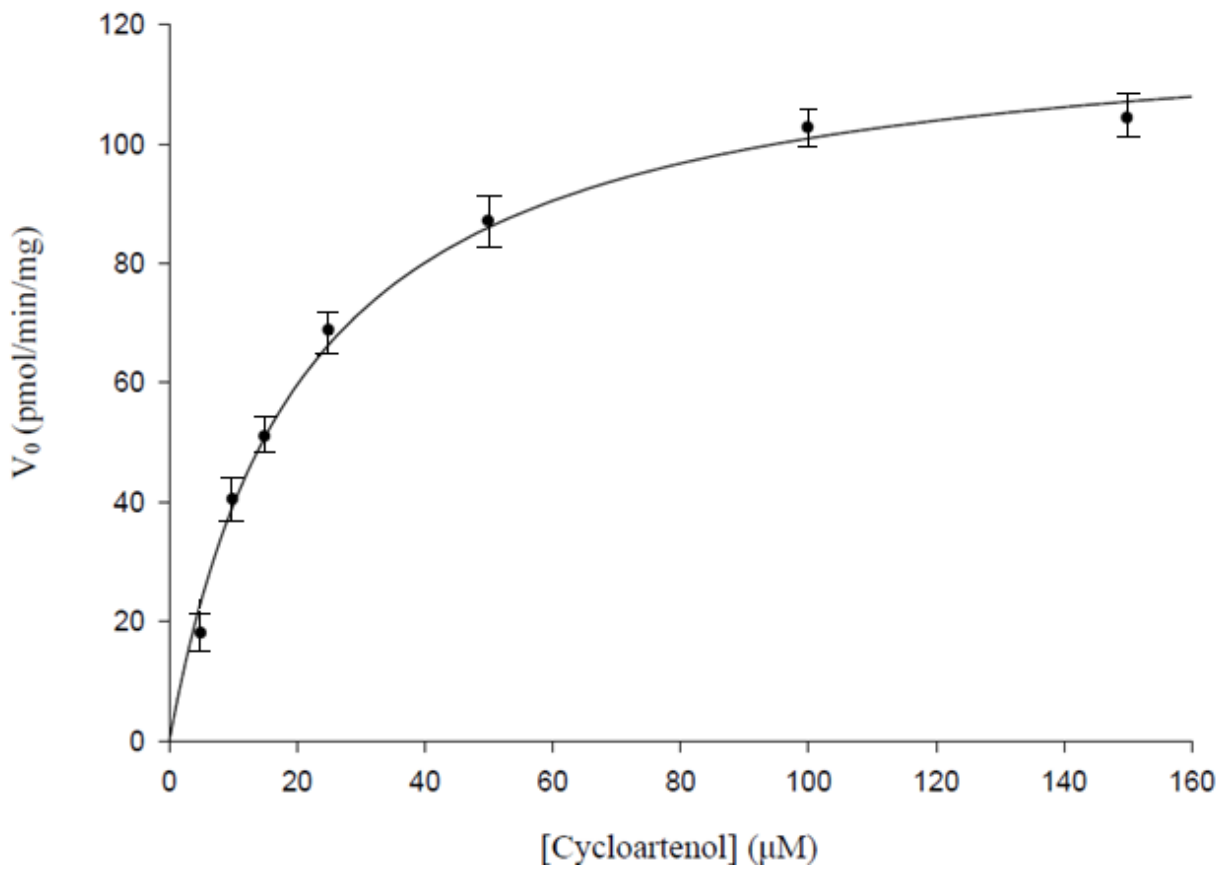

Supplemental Figure S3. Michaelis-Menten plot determined under initial velocity conditions of *CrSMT2* incubated with cycloartenol at concentrations varied from 5 to 150  $\mu\text{M}$  and SAM fixed at saturation of 100  $\mu\text{M}$ . Reactions were performed for 45 min at 35  $^{\circ}\text{C}$  in phosphate buffer pH 7.5. Datapoints were assays of triplicate determinations. Error bars represent standard error (SEM).

|                       |            |                                                                                                                                                                                                                                                                                           |     |
|-----------------------|------------|-------------------------------------------------------------------------------------------------------------------------------------------------------------------------------------------------------------------------------------------------------------------------------------------|-----|
| <i>C. reinhardtii</i> | SMT1 (1)   | MAVALPAAVTSAYERLAGEFDKLTSTQKYAVGIAGGVTSLYLLAKVLKGSDDRDKPTTL-----QLSGGSDISSKVKDEFT                                                                                                                                                                                                         | 75  |
| <i>T. brucei</i>      | SMT1 (1)   | -----MS-----AG-----SRGPLSLLIARERDANGVNGDVNATAGRLR                                                                                                                                                                                                                                         | 34  |
| <i>S. cerevisiae</i>  | SMT1 (1)   | -----MSETELRKRQAQFTRE----LHGD----DIGKKTGLSAL-----MSKNNSAQKEAVQKYLR                                                                                                                                                                                                                        | 48  |
| <i>G. max</i>         | SMT1 (1)   | -----MDPLSLFCTGALLAGG----LYWFVCLVLPAEQKGRAT-----DLGGGSIASAEKVQDNYK                                                                                                                                                                                                                        | 52  |
| <i>A. thaliana</i>    | SMT2 (1)   | -----MDSLTLFPTGALVAVG----IYWFLCVLGPAAERKGRRAV-----DLGGGSIASAEKVQDNYK                                                                                                                                                                                                                      | 52  |
| <i>C. reinhardtii</i> | SMT1 (76)  | AYADSYGKNAGEGITDRSKTVHLVDVVFYSLVTDI <b>YEWGNGQS FHF</b> SPKLPNKDLKASEAAH <b>EAR</b> IAALLRLQPQQA <b>LDC</b>                                                                                                                                                                               | 155 |
| <i>T. brucei</i>      | SMT1 (35)  | DRYDGGASAS---ERRQDATSLTNEYVDIVTD <b>YEWGNGQN FHF</b> APRYMNETFYE SLARYEYFLAYHAQFKPDTDT <b>LDV</b>                                                                                                                                                                                         | 111 |
| <i>S. cerevisiae</i>  | SMT1 (49)  | NWDGRTDKDAE--ERRLEDYNEATHSYVNVVTD <b>YEWGNGSS FHF</b> SRFYKGESFAAS IARHEHYLAKAGIQRGDL <b>LDV</b>                                                                                                                                                                                          | 126 |
| <i>G. max</i>         | SMT1 (53)  | QYWSFFRRFKE--IETADKVPDFVDTFYNLVTDI <b>YEWGNGQS FHF</b> SPSIPGKSHRDATRLHEEMAVDLIEAKPGNR <b>LDV</b>                                                                                                                                                                                         | 130 |
| <i>A. thaliana</i>    | SMT2 (53)  | QYWSFFRRFKE--IETAEKVPDFVDTFYNLVTDI <b>YEWGNGQS FHF</b> SPSIPGKSHKDATRLHEEMAVDLIQVKPGQ <b>LDV</b>                                                                                                                                                                                          | 130 |
| <i>C. reinhardtii</i> | SMT1 (156) | <b>GCGVGG</b> MRVAAVSGAHITGITIN <b>YQ</b> VDRAKTHNARQGLAPLTDVVRGDF <b>TNMPFKENTFDGAE</b> <b>YAI</b> EAT <b>CH</b> A <b>AK</b> LEQV                                                                                                                                                        | 235 |
| <i>T. brucei</i>      | SMT1 (112) | <b>GCGIGG</b> ARMVRFATSCNVMGVNN <b>YEQ</b> INRARQHDSRYGMSGRINVTKID <b>FCNMC</b> FGD <b>NEFDGAE</b> <b>YAI</b> EAT <b>CH</b> ESK <b>VK</b> VC                                                                                                                                              | 191 |
| <i>S. cerevisiae</i>  | SMT1 (127) | <b>GCGVGG</b> AREIARFTGCNVIGLN <b>NDYQ</b> IAKAKYYAKYKNSLDQMD <b>PFVKGDFM</b> MD <b>FEENTFDK</b> V <b>YAI</b> EAT <b>CH</b> A <b>AK</b> LEGV                                                                                                                                              | 206 |
| <i>G. max</i>         | SMT1 (131) | <b>GCGVGG</b> MRAIAAHSRANVVGITIN <b>YQ</b> VNRARMHNKKAGLESCEVVC <b>GNFLKMP</b> FPD <b>NSFDGAE</b> <b>YSI</b> EAT <b>CH</b> A <b>AK</b> LEEV                                                                                                                                               | 210 |
| <i>A. thaliana</i>    | SMT2 (131) | <b>GCGVGG</b> MRAIASHSRANVVGITIN <b>YQ</b> VN <b>AR</b> LHNKKAGLDALCEVVC <b>GNFLQMP</b> FPD <b>NSFDGAE</b> <b>YSI</b> EAT <b>CH</b> A <b>AK</b> LEEV                                                                                                                                      | 210 |
| <i>C. reinhardtii</i> | SMT1 (236) | <b>YGEIYRV</b> <b>IKPGSYFVSYEW</b> VSTQKFDVN <b>NAEHV</b> KIMDEIN <b>FG</b> NGL <b>PE</b> MRTWKEADAGK <b>NVGFE</b> L <b>VMS</b> LDLATA----SV                                                                                                                                              | 311 |
| <i>T. brucei</i>      | SMT1 (192) | <b>YSEVFR</b> <b>IKPGAYFMLYEW</b> CLTDLYDPANE <b>EHQ</b> VRVHGIEL <b>GDGLPE</b> LD <b>TM</b> RQVVA <b>AVKAA</b> GF <b>VVEES</b> FD <b>MAE</b> RFESGEP                                                                                                                                     | 271 |
| <i>S. cerevisiae</i>  | SMT1 (207) | <b>YSEIYK</b> V <b>IKPGGTFAVYEW</b> MTDKRYDEN <b>NPEHR</b> KIAYEIEL <b>GDGI</b> PF <b>M</b> HVDVARKAL <b>KNC</b> GF <b>VLV</b> SEDLADN----D                                                                                                                                               | 281 |
| <i>G. max</i>         | SMT1 (211) | <b>YAEIFR</b> V <b>IKPGALYVSYEW</b> TTDKRYGDD <b>PEH</b> VEVIQ <b>GI</b> ER <b>GDAL</b> PL <b>GR</b> NYTDIAETARK <b>VGF</b> AV <b>VKER</b> DLAKP----P                                                                                                                                     | 285 |
| <i>A. thaliana</i>    | SMT2 (211) | <b>YAEIYRV</b> <b>IKPGSMYVSYEW</b> TT <b>E</b> K <b>FK</b> AE <b>DD</b> EH <b>VE</b> VIQ <b>GI</b> ER <b>GDAL</b> PL <b>GR</b> AVVDIAETARK <b>VGF</b> IV <b>KER</b> DLAS <b>P</b> ----P                                                                                                   | 285 |
| <i>C. reinhardtii</i> | SMT1 (312) | VAG <b>PWY</b> -----E <b>RL</b> RM <b>GKY</b> THAINHGIVSTVDAL <b>GLAP</b> K <b>LK</b> EVH <b>ML</b> VE <b>VAK</b> SL <b>I</b> Q <b>GGES</b> G <b>IF</b> PM <b>H</b>                                                                                                                       | 374 |
| <i>T. brucei</i>      | SMT1 (272) | K <b>SV</b> P <b>WY</b> E <b>PL</b> Q <b>GSY</b> -----T <b>SL</b> S <b>L</b> GRAT <b>PA</b> GR <b>WLT</b> SV <b>TC</b> RL <b>LE</b> AV <b>RLAP</b> AG <b>TC</b> KATE <b>ILE</b> E <b>GA</b> V <b>N</b> L <b>V</b> RG <b>GEL</b> G <b>IF</b> PM <b>H</b>                                   | 344 |
| <i>S. cerevisiae</i>  | SMT1 (282) | DE <b>IP</b> W <b>Y</b> PL <b>T</b> GE <b>W</b> K <b>Y</b> Q <b>N</b> LAN <b>LA</b> TF <b>FR</b> TS <b>YL</b> GR <b>Q</b> PT <b>AM</b> V <b>T</b> ME <b>K</b> RL <b>GLAP</b> EG <b>S</b> KE <b>V</b> T <b>A</b> LE <b>NA</b> AV <b>GL</b> V <b>AG</b> GS <b>K</b> L <b>IF</b> PM <b>H</b> | 361 |
| <i>G. max</i>         | SMT1 (286) | A <b>Q</b> - <b>P</b> W <b>W</b> -----S <b>RL</b> FM <b>G</b> RI <b>AY</b> WR <b>N</b> H <b>I</b> V <b>V</b> T <b>V</b> LA <b>AL</b> GI <b>AP</b> K <b>GT</b> V <b>D</b> V <b>H</b> EM <b>L</b> FR <b>T</b> AD <b>Y</b> L <b>TR</b> GG <b>D</b> S <b>G</b> I <b>F</b> PM <b>H</b>         | 347 |
| <i>A. thaliana</i>    | SMT2 (286) | AE- <b>P</b> W <b>W</b> -----T <b>RL</b> FM <b>G</b> RL <b>AY</b> WR <b>N</b> H <b>I</b> V <b>V</b> Q <b>I</b> L <b>SA</b> V <b>GV</b> AP <b>K</b> GT <b>V</b> D <b>V</b> H <b>EM</b> L <b>FR</b> T <b>AD</b> Y <b>L</b> TR <b>G</b> GET <b>G</b> I <b>F</b> PM <b>H</b>                  | 347 |
| <i>C. reinhardtii</i> | SMT1 (375) | LLL <b>FR</b> K <b>P</b> GAD <b>K</b> KK----- 387                                                                                                                                                                                                                                         |     |
| <i>T. brucei</i>      | SMT1 (345) | F <b>V</b> K <b>AR</b> K <b>P</b> RL <b>GE</b> EL <b>S</b> C----- 359                                                                                                                                                                                                                     |     |
| <i>S. cerevisiae</i>  | SMT1 (362) | LF <b>V</b> AR <b>K</b> P <b>E</b> NA <b>E</b> T <b>P</b> S <b>Q</b> T <b>S</b> Q <b>E</b> AT <b>Q</b> 383                                                                                                                                                                                |     |
| <i>G. max</i>         | SMT1 (348) | MIL <b>CR</b> K <b>P</b> H <b>D</b> K <b>D</b> D <b>H</b> N----- 361                                                                                                                                                                                                                      |     |
| <i>A. thaliana</i>    | SMT2 (348) | MIL <b>CR</b> K <b>P</b> ES <b>P</b> EE <b>S</b> S----- 361                                                                                                                                                                                                                               |     |

Supplemental Figure S4. Alignment of sterol methyltransferase amino acid sequences (GenBank accession numbers) from *C. reinhardtii* (gi|159465129), *T. brucei* (gi|70832598), *S. cerevisiae* (gi|6323635), *G. max* (gi|242755433) and *A. thaliana* (gi|332191841). Identical residues conserved in the primary structure are in red. The sequences were aligned using Align X (Informax Inc) with defaulted parameters. The deduced substrate preference of SMT catalyzes the first ( $\Delta$ 24(25)-substrate or second ( $\Delta$ 24(28)-substrate) C1-transfer reaction, SMT1 or SMT2 is reported. Sterol and SAM binding sites are indicated as boxed Regions 1, 2 and 4 or Region 2, respectively.

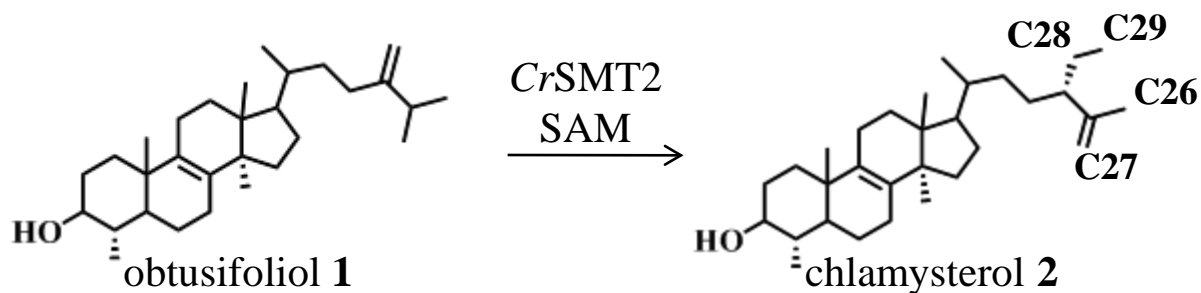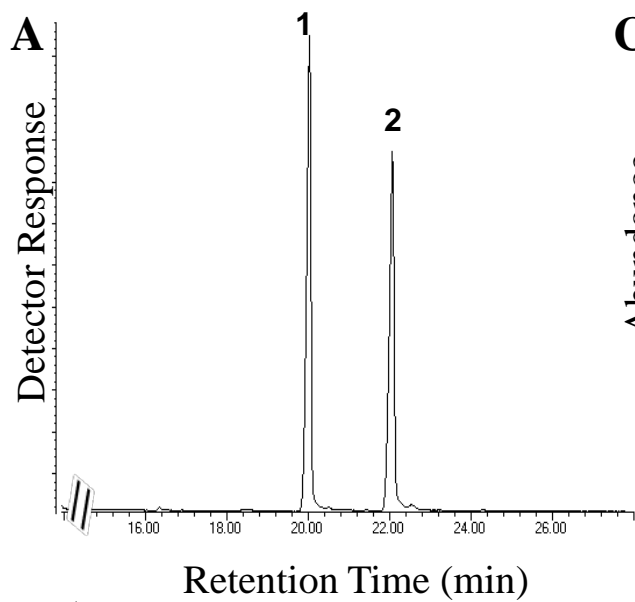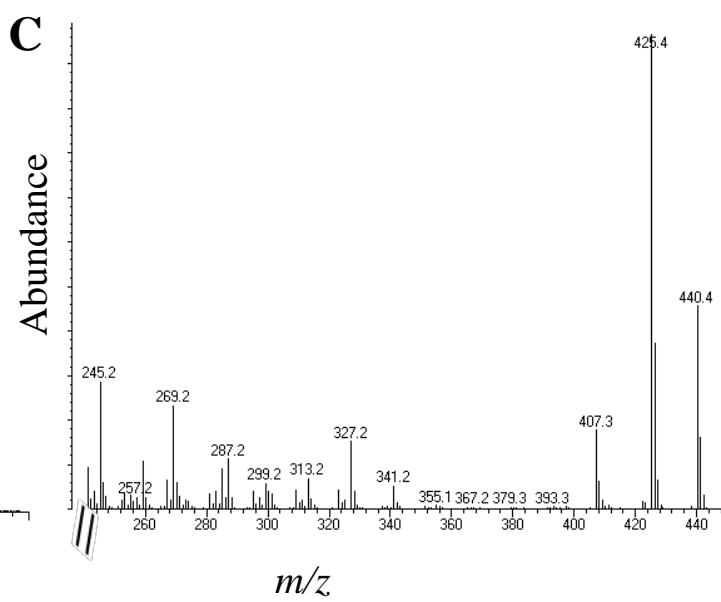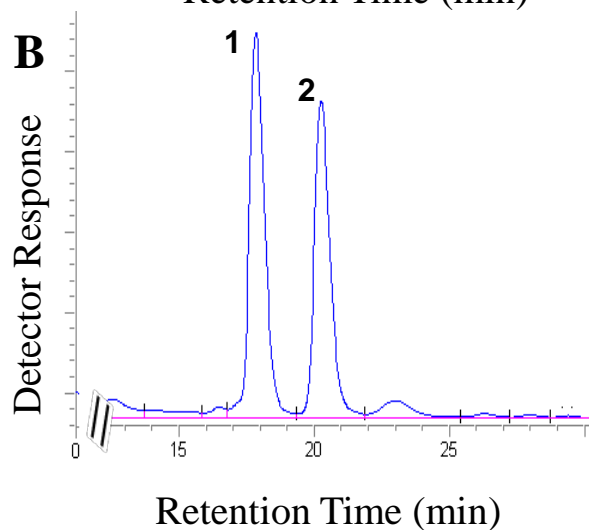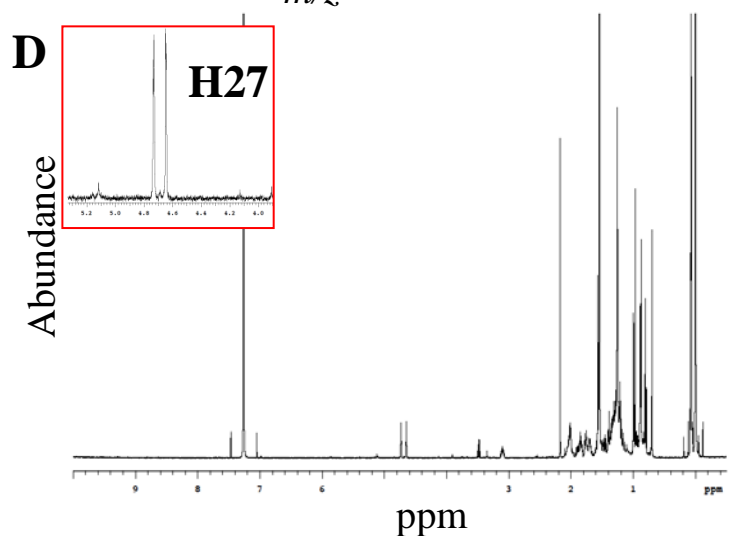

Supplemental Figure S5. Spectral and chromatographic properties of *CrSMT2*-generated chlamysterol 2. (A) TIC chromatogram of obtusifoliol 1 conversion to chlamysterol 2. C-MS (30 m HP-5 capillary column) coupled to HP 6890 gas chromatograph interfaced to a 5973 mass spectrometer at 70 eV; GC flow rate of He was set at 1.2 ml/min, injector port was 250 °C and the initial temperature was set at 170 °C, held for 3 min, and increased at 19 °C/min to 280 °C. (GC Method B) Cholesterol eluted at 16.5 min. (B) RP-HPLC chromatogram of 1 conversion to 2. Phenomenex Luna C18(2) column, 250 mm x 4.6 mm x 5  $\mu$ m, (Phenomenex, Torrance) eluted with 100 % methanol at 1 mL/min and 20 °C, monitored at 210 nm. At these conditions, cholesterol eluted at 17 min. (C) High-end EI mass spectrum of 2. Base peak is 425 [M<sup>+</sup> – Me]. (D) <sup>1</sup>HNMR at 500 MHz of 2. Olefinic signals of H27.



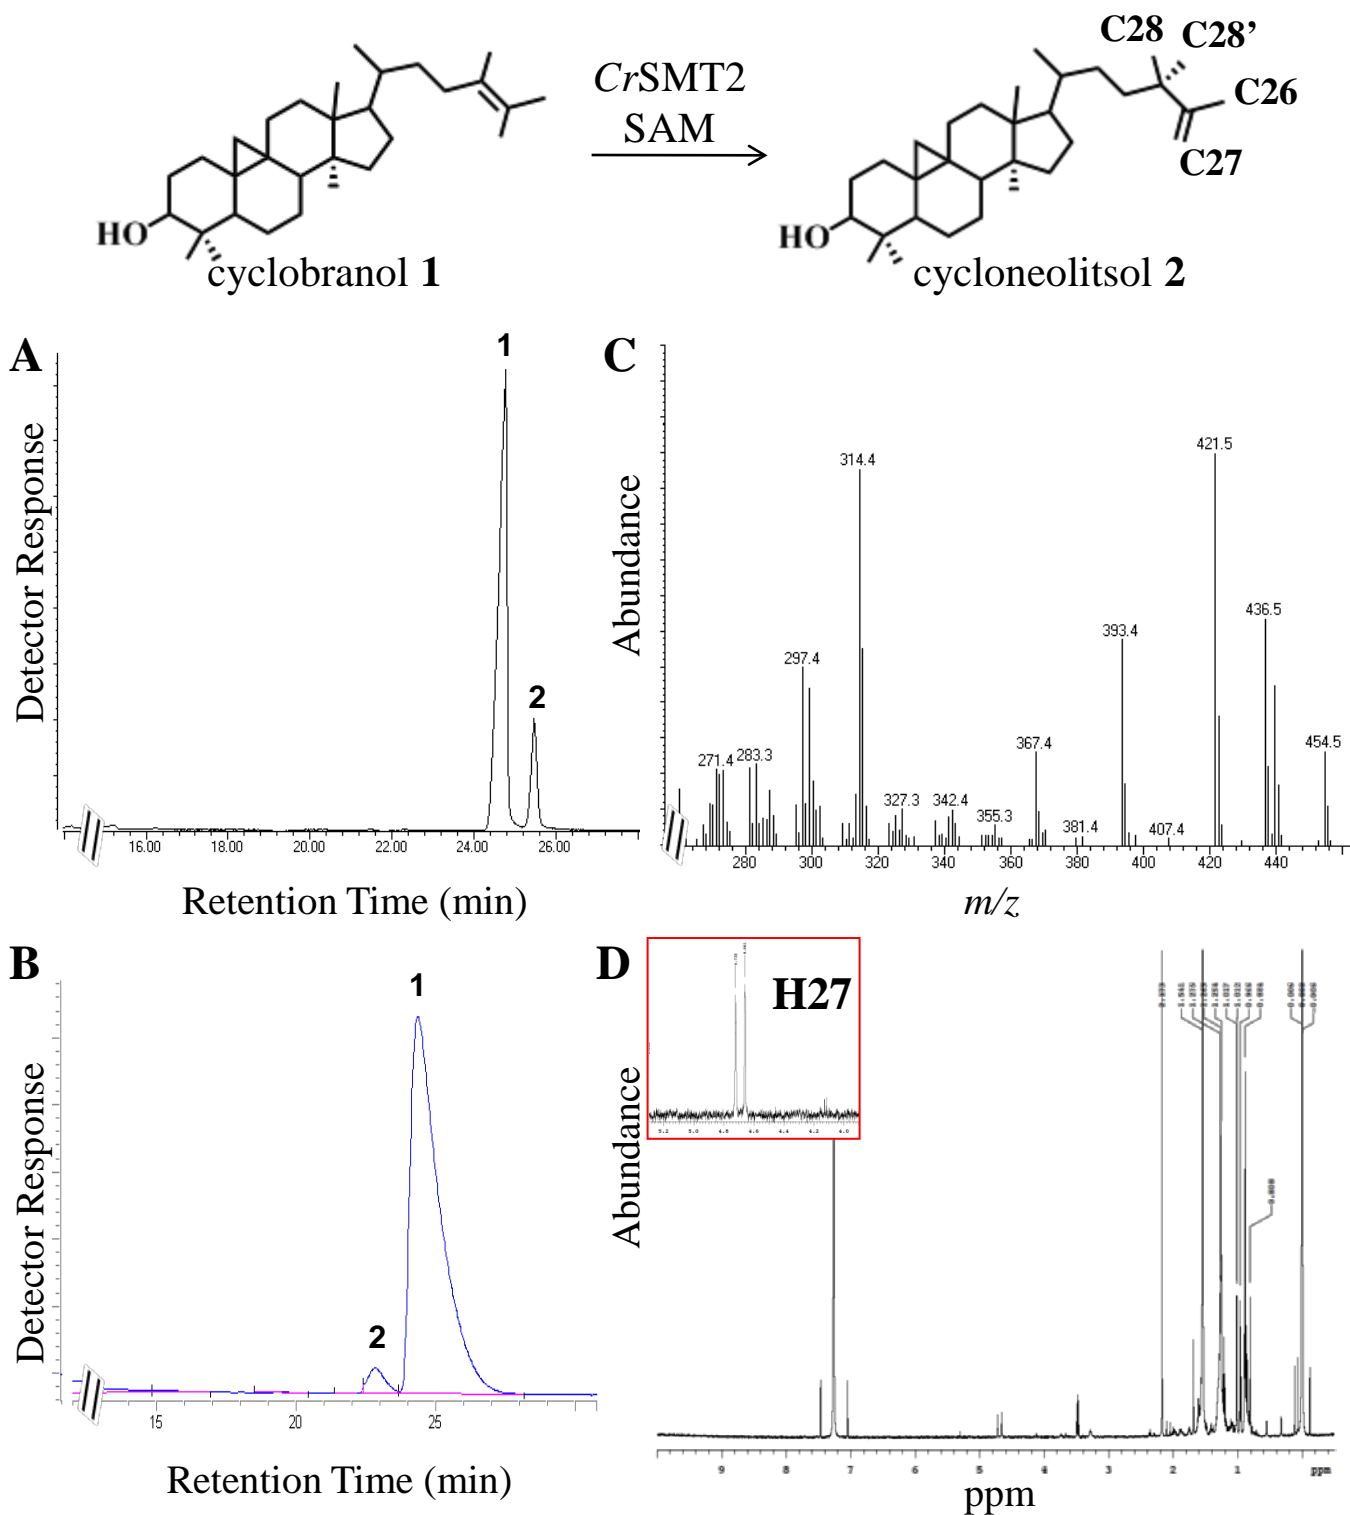

Supplemental Figure S7. Spectral and chromatographic properties of *CrSMT*-generated cycloneolitsol. (A) TIC chromatogram of cyclobranol 1 conversion to cycloneolitsol 2. GC flow rate of He was set at 1.2 ml/min, injector port was 250 °C and the initial temperature was set at 170 °C, held for 3 min, and increased at 20°C/min to 280 °C. Cholesterol eluted at 14.2 min. (B) RP-HPLC chromatogram of 1 conversion to 2. Phenomenex Luna C18(2) column, 250 mm x 4.6 mm x 5 μm, eluted with isocratic 60:40 (v/v) acetonitrile/2-propanol at 1 ml/min and 25 °C, monitored at 210 nm. Cholesterol eluted at 12 min. (C) High-end EI mass spectrum of 2. High end has been adjusted to show detail (base peak is 95 amu,  $M^+$  is 4 %,  $M^+$  - Pr 421 is 17 %). (D)  $^1\text{H}$ NMR at 500 MHz of 2. Inset: Olefinic signals of H27.



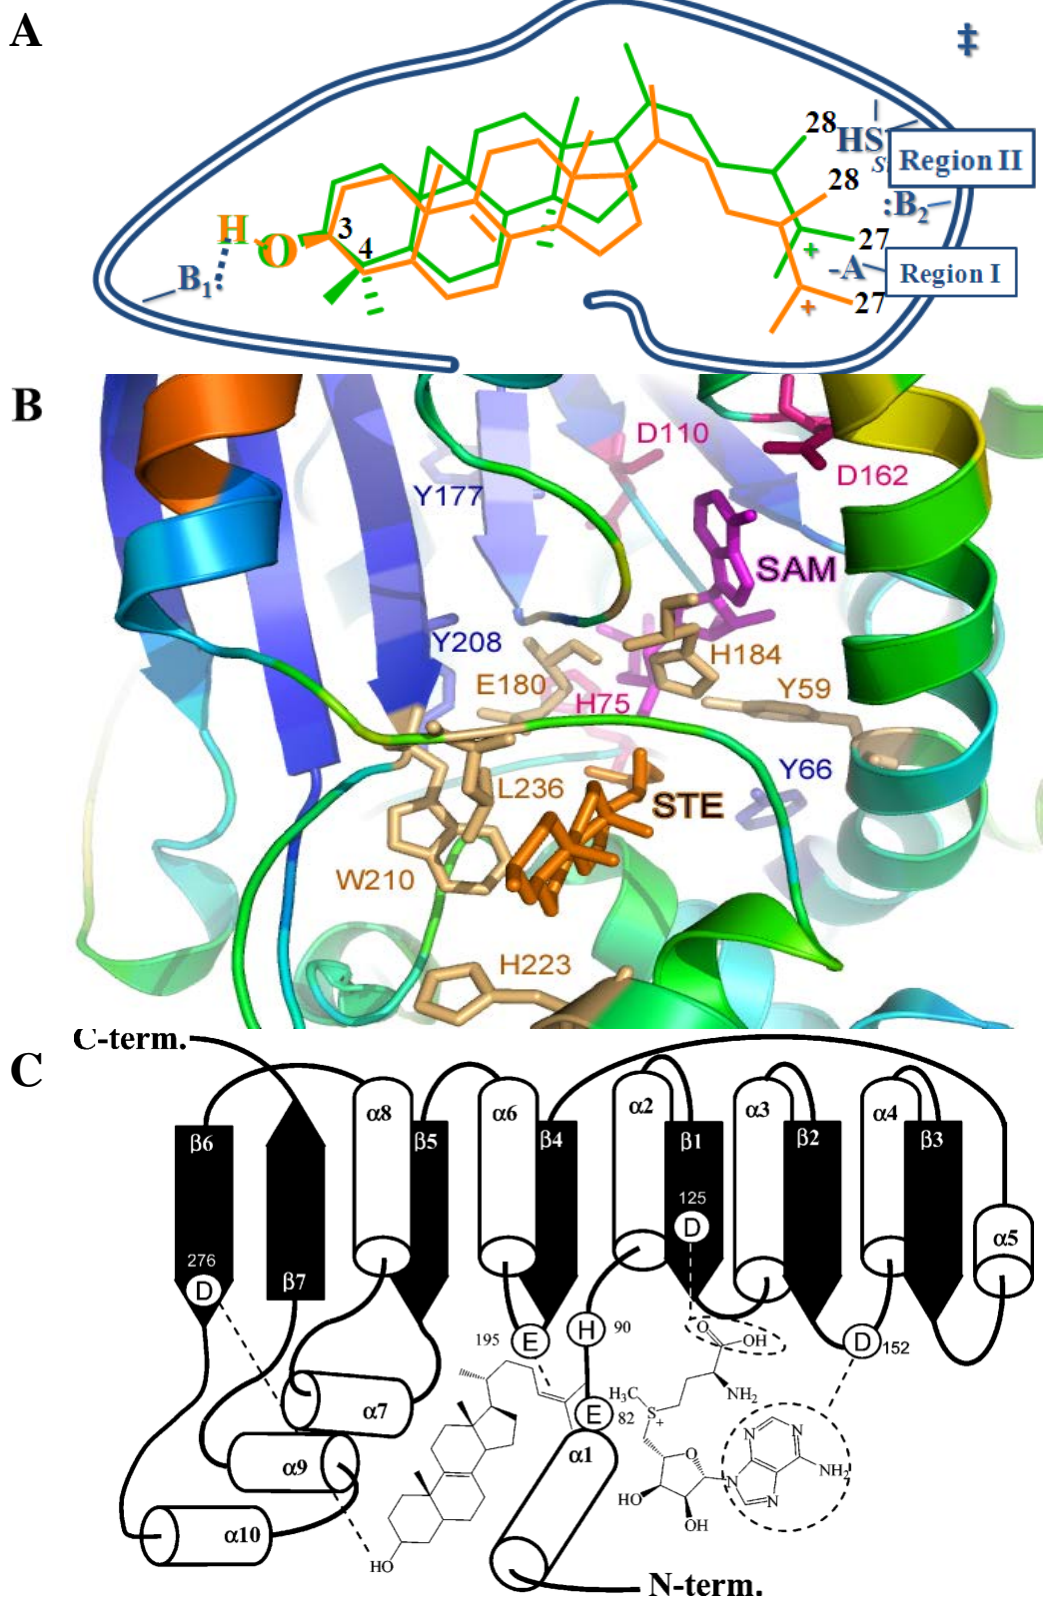

Supplemental Figure S7. Different views of substrate-SMT interactions (adapted from references 5-7): A- 24-methylated zymosterol (orange) and 24-methylated cycloartenol (green) bound in the transition state, B and C-Homology models are taken from *TbSMT* and *ScSMT*, respectively, where details of the modeling are described including software. .

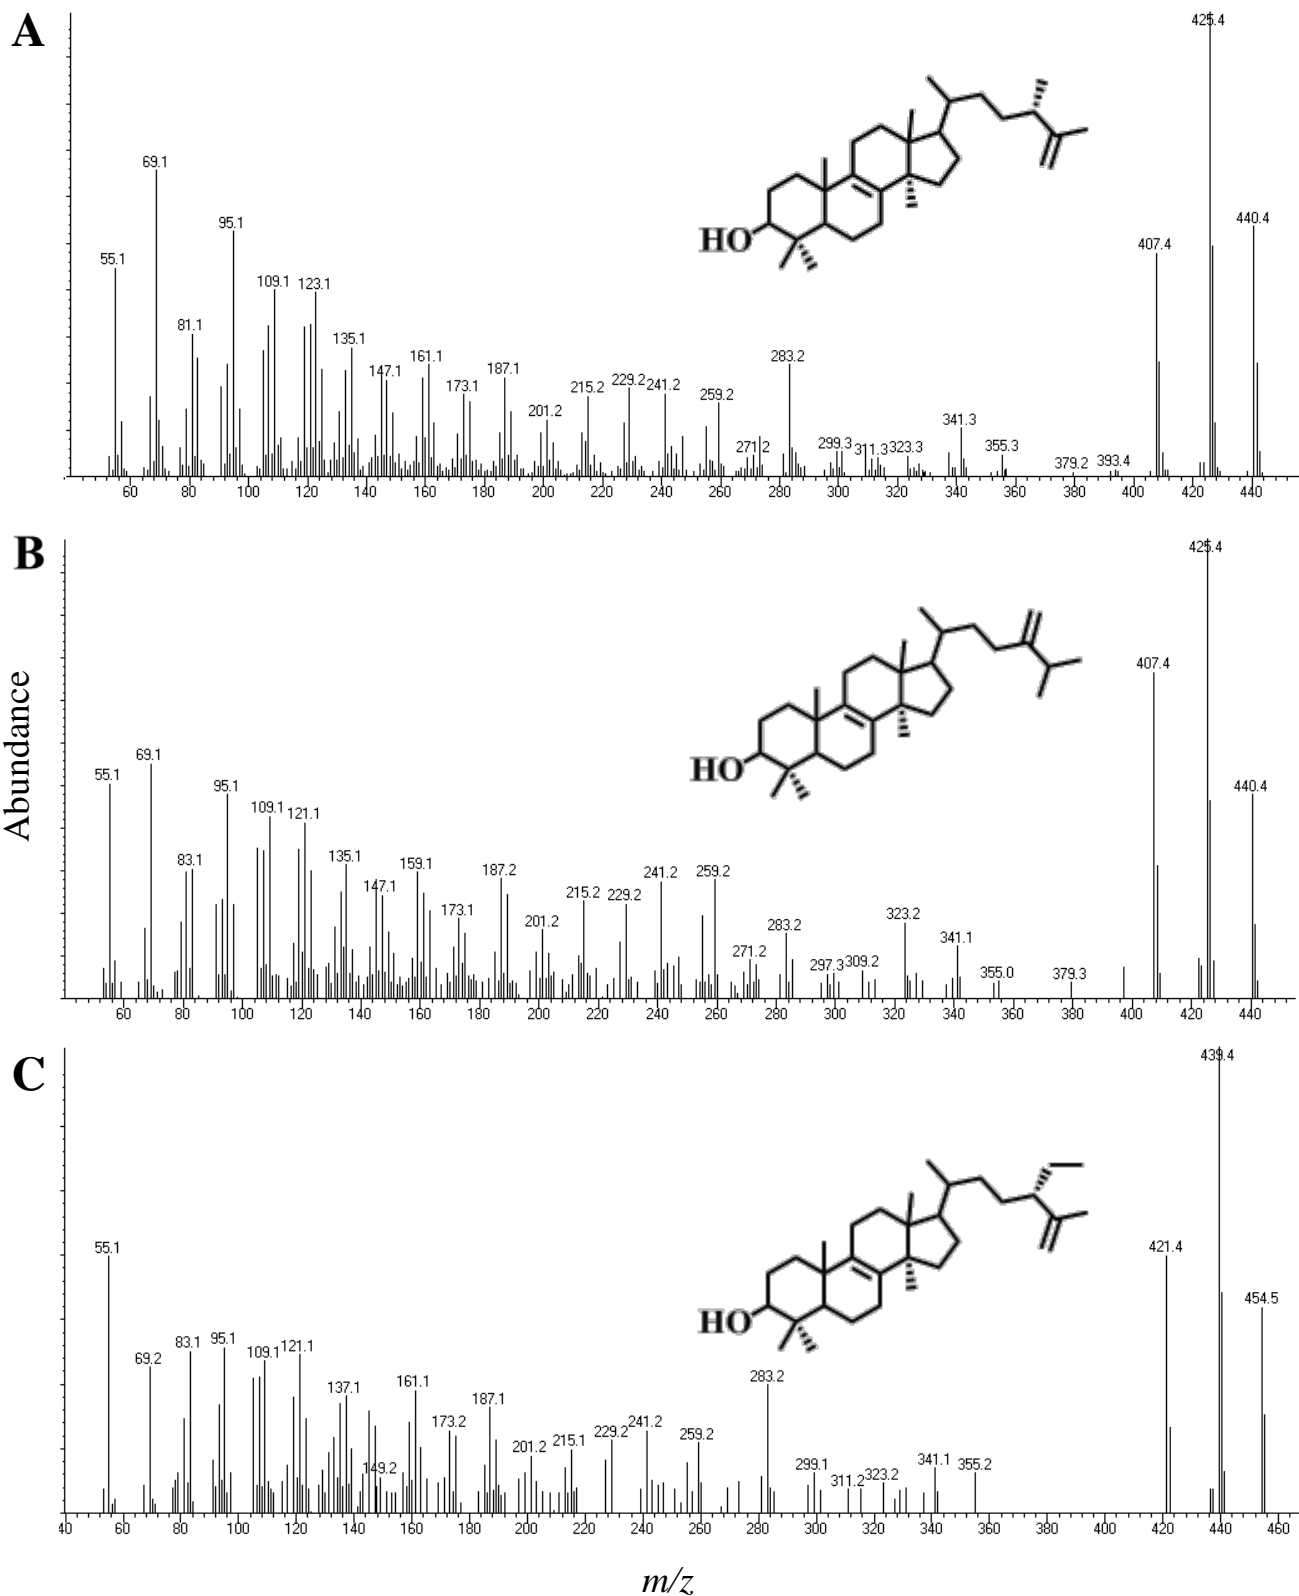

Supplemental Figure S8. Mass spectra of products of first and second  $C_1$ -transfer to lanosterol by *CrSMT2*. A. 24 $\beta$ -methyl lanosta-8,25(27)-dienol B. eburicol (24(28)-methylenelanost-8-enol) C. 24 $\beta$ -ethyl lanosta-8,25(27)-dienol . (see text for details for preparations of activity assays).

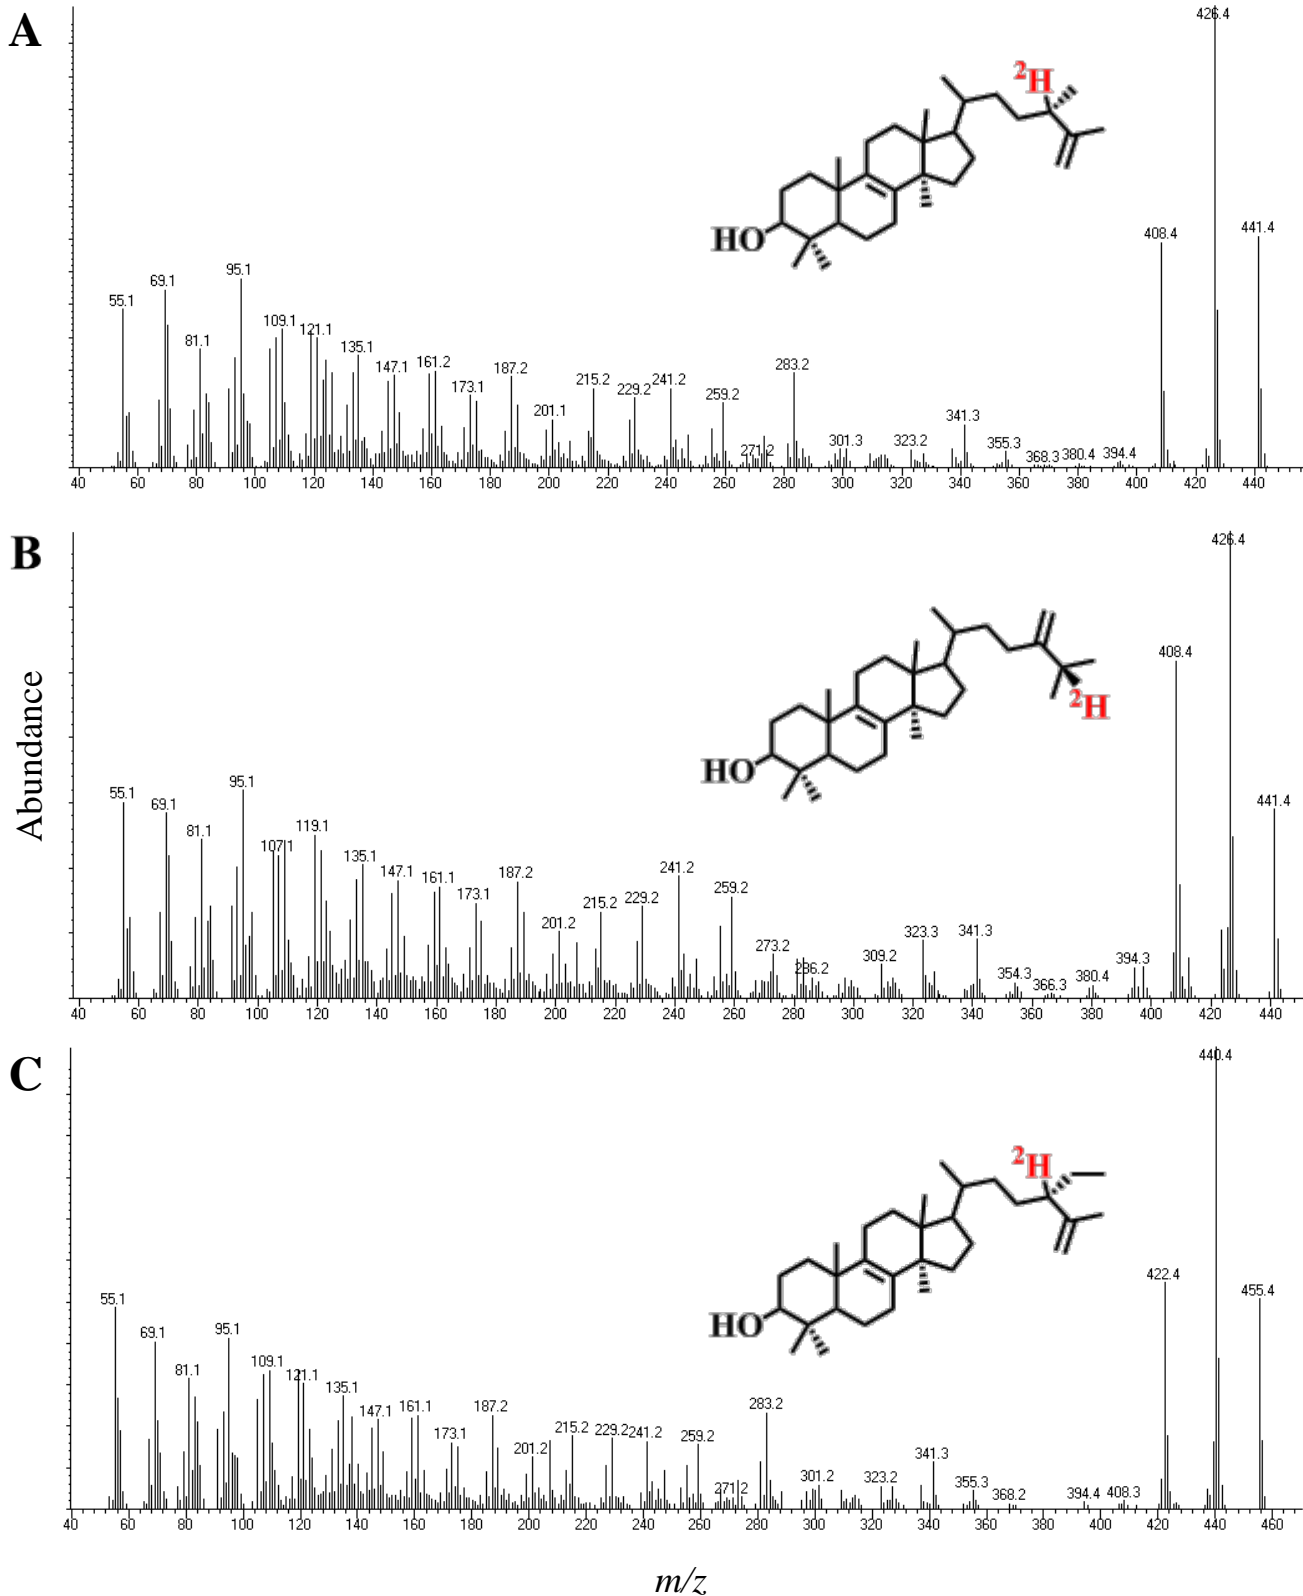

Supplemental Figure S9. Mass spectra of products of first and second  $C_1$ -transfer to  $[24-^2H]$ lanosterol by *CrSMT2*. A.  $24\beta$ -methyl  $[24\alpha-^2H]$ lanosta-8,25(27)-dienol B.  $[25-^2H]$ eburicol (24(28)-methylene  $[25-^2H]$ lanost-8-enol) C.  $24\beta$ -ethyl  $[24-^2H]$ lanosta-8,25(27)-dienol

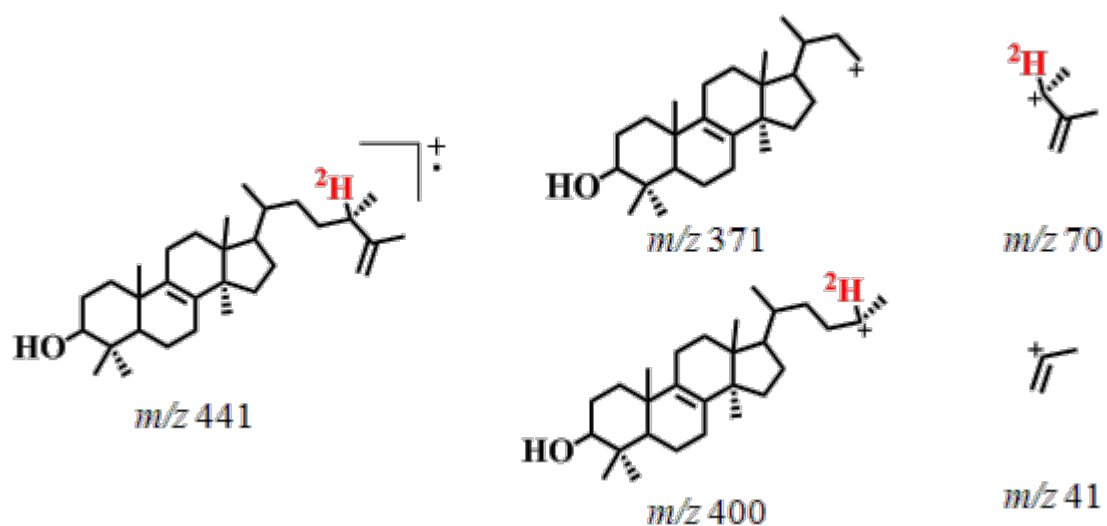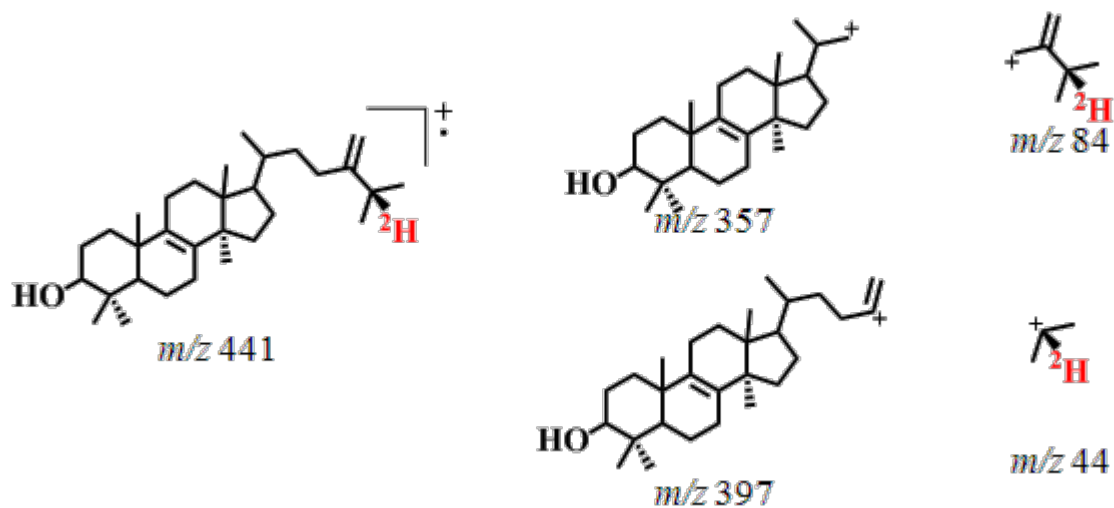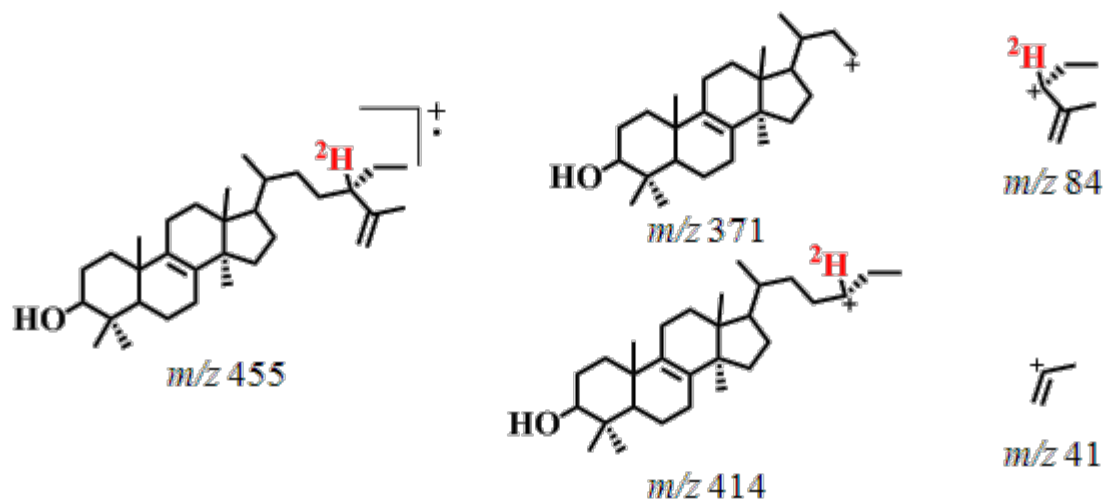

Supplemental Figure S10. Molecular ions and diagnostic fragmentations for stereospecifically labeled products of first and second C<sub>1</sub>-transfer to [24-<sup>2</sup>H]lanosterol by CrSMT2. EI-mass spectral data was collected from 50-550 a.m.u.

## REFERENCES

1. Weete, J. D., Abril, M. and Blackwell, M. (2010) Phylogenetic distribution of fungal sterols. *Plos One* 5(5):e10899
2. Miller, M. B., Haubrich, B. A., Wang, Q., Snell, W. J. and Nes, W. D. (2012) Evolutionary conserved  $\Delta^{25(27)}$ -olefin ergosterol biosynthesis pathway in the alga *Chlamydomonas reinhardtii*. *J. Lipid Res.* **53**, 1636-1645
3. Neelakandan, A. K., Song, Z., Wang, J., Richards, M. H., Wu, X., Valliyodan, B., Nguyen, H. T. and Nes, W. D. (2009) Cloning, functional expression, and phylogenetic analysis of plant 24C-methyltransferases involved in sitosterol biosynthesis. *Phytochemistry* **70**, 1982-1998
4. Goad, L. J. and Akihisa, T. (1997) Analysis of sterols. Blackie Academic, London
5. Zhou, W., Nguyen, H. T. and Nes, W. D. (2008) Plant sterol methyltransferases: phytosterolomic analysis, enzymology, and bioengineering strategies. *In Methods in Plant Biochemistry and Molecular Biology* Vol. 1. N. G. Lewis, editor. Elsevier Science, Amsterdam. 241-281
6. Ganapathy, K., Jones, C. W., Stephens, C. M., Vatsyayan, R., Marshall, J. A. and Nes, W. D. (2008) Molecular probing of the *Saccharomyces cerevisiae* sterol C24- methyltransferase (SMT) reveals multiple amino acids involved in C2-transfer activity. *Biochim. Biophys Acta* **1781**, 344-351
7. Liu, J., Ganapathy, K. , Wywial, E., Bujinicki, J. M., Nwogwugwu, C.A. and Nes, W. D. (2011) Effect of substrate features and mutagenesis of active site tyrosine residues on the reaction course catalyzed by *Trypanosoma brucei* sterol C24-methyltransferase. *Biochem. J.* **439**, 413-422
